# Supplementary material for: Swelling, Rupture and Endosomal Escape of Biological Nanoparticles per se and Those Fused with Liposomes in Acidic Environment
Source: Preprints.org preprint supplement (doi:10.20944/preprints202404.1124.v1), 2024-04-17
Supplement: Supplementary file 1 [file supplementary]

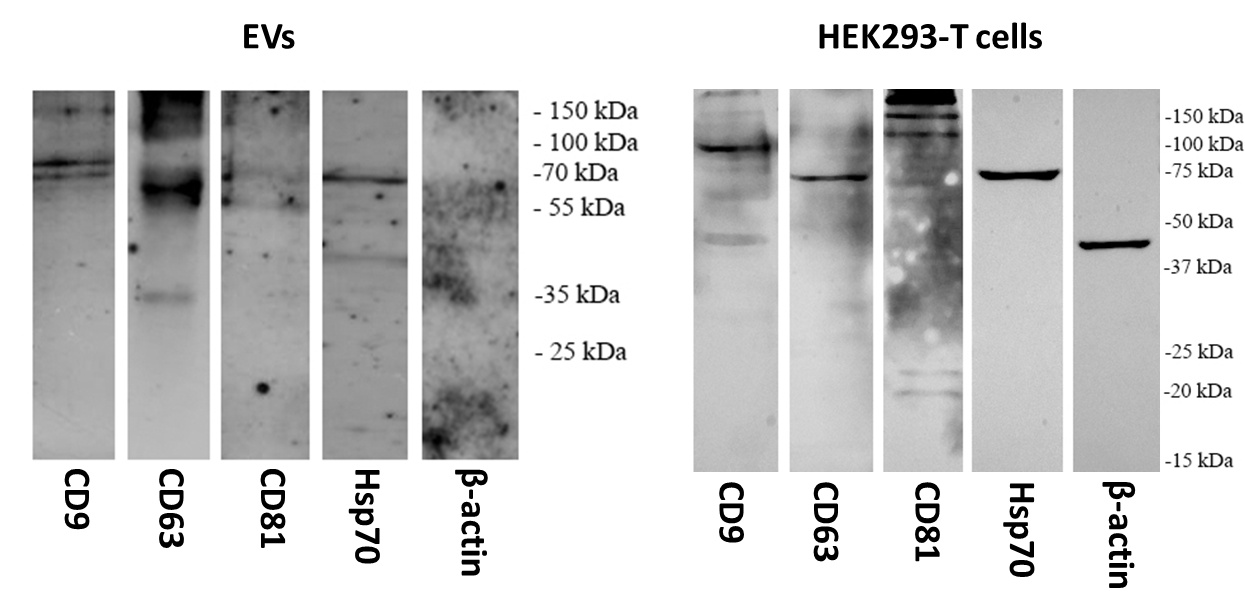


**Figure S1. Protein expression analysis.** Analysis of EVs-specific protein biomarkers (CD9, CD63, CD81, Hsp70) and β-actin as housekeeping control in isolated EVs and HEK293-T cells.
